# Supplementary material for: The impact of gaseous degradation on the gas–particle partitioning of methylated polycyclic aromatic hydrocarbons
Source: Copernicus journal article supplement (doi:10.5194/acp-24-6095-2024), 2024-05-27
Supplement: Supplementary file 1 [file acp-24-6095-2024-supplement.pdf]

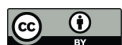

*Supplement of*

## **The impact of gaseous degradation on the gas–particle partitioning of methylated polycyclic aromatic hydrocarbons**

**Fu-Jie Zhu et al.**

*Correspondence to:* Wan-Li Ma ([mawanli002@163.com](mailto:mawanli002@163.com))

The copyright of individual parts of the supplement might differ from the article licence.

# Contents

## Text

|                                                                                                                    |   |
|--------------------------------------------------------------------------------------------------------------------|---|
| Text S1. The derivation of the $\log K_P'$ for LMW SVOCs based on the new steady-state G–P partitioning model..... | 3 |
|--------------------------------------------------------------------------------------------------------------------|---|

## Tables

|                                                                                                                                              |    |
|----------------------------------------------------------------------------------------------------------------------------------------------|----|
| Table S1. Information of 49 Me-PAHs .....                                                                                                    | 5  |
| Table S2. Values and the calculation parameters for $A$ and $B$ of several Me-PAHs .....                                                     | 8  |
| Table S3. Calculation parameters for $\log K_{OA}$ (25°C) and $\Delta H_{OA}$ (kJ/mol).....                                                  | 10 |
| Table S4. The geometric mean values of the N/D ratios for different phases Me-PAHs in different seasons .....                                | 11 |
| Table S5. Gaseous degradation rate ( $\text{h}^{-1}$ ) (hydroxyl radicals reaction) of Me-Naps and U-PAHs under different temperatures ..... | 13 |

## Figures

|                                                                                                                                                     |    |
|-----------------------------------------------------------------------------------------------------------------------------------------------------|----|
| Fig. S1. Chromatographic separation of 49 Me-PAHs in standard solutions (100 ng/mL)                                                                 | 15 |
| Fig. S2. Comparison of the values of N/D ratios for individual Me-PAHs between particle phase and gas phase .....                                   | 16 |
| Fig. S3. Comparison the regression lines of $\log K_P'$ against $\log K_{OA}$ between daytime and nighttime for total Me-PAHs .....                 | 17 |
| Fig. S4. Comparison of the regression lines of $\log K_P'$ against $\log K_{OA}$ between daytime and nighttime for part of individual Me-PAHs ..... | 18 |
| Fig. S5. The fluxes related to the gas and particle phase in the six-compartment model....                                                          | 19 |

**Text S1. The derivation of the log  $K_P'$  for LMW SVOCs based on the new steady-state G–P partitioning model**

The gas–particle (G–P) partitioning quotient ( $K_P'$ ) can be calculated as follows:

$$K_P' = (C_P/C_G)/TSP \quad (S1)$$

where,  $C_P$  (ng/m<sup>3</sup> air) and  $C_G$  (ng/m<sup>3</sup>) are the concentrations of SVOCs in particle phase and gas phase, respectively, and  $TSP$  is the concentrations of total suspended particles (μg/m<sup>3</sup>).

$C_P$  can be transferred to  $C'_P$  (ng/m<sup>3</sup> particle) based the following equation:

$$C_P = C'_P \times TSP/10^9\rho_P \quad (S2)$$

where,  $C'_P$  (ng/m<sup>3</sup> particle) is the concentrations in particle phase with different units, and  $\rho_P$  is the density of particles (kg/m<sup>3</sup>).

Then, the Eq. (S1) can be expressed in different form:

$$K_P' = (C'_P/C_G)/10^9\rho_P \quad (S3)$$

The ratio of  $C'_P$  to  $C_G$  can be calculated using the method from the multimedia fugacity model:

$$C'_P/C_G = f_P Z_P/f_G Z_G \quad (S4)$$

where,  $f_P$  and  $f_G$  are the fugacity for particle phase and gas phase, respectively,  $Z_P$  and  $Z_G$  are the fugacity capacity for particle phase and gas phase, respectively.

$Z_P/Z_G$  equal to  $K_{PG}$  at equilibrium state, which can be calculated by the following equation (Li et al., 2015):

$$K_{PG} = Z_P/Z_G = 10^9\rho_P K_{P-HB} \quad (S5)$$

where,  $K_{P-HB}$  is the G–P partitioning coefficient calculated from the H-B model (the equilibrium-state model) (Harner and Bidleman, 1998).

Summarizing the equations above, log  $K_P'$  can be expressed as following equation:

$$\log K_P' = \log K_{P-HB} + \log(f_P/f_G) \quad (S6)$$

According to the Eq. (5),  $K_P'$  will upward deviate from  $K_{P-HB}$  (or the equilibrium state) when  $f_P > f_G$ . Based on our previous study (Zhu et al., 2023), the fugacity ratio of

the particle phase to the gas phase can be expressed as Eq. (S7), when the steady state is reached between gas phase and particle phase:

$$\frac{f_P}{f_G} = \frac{D_{GP} + \phi_0 D_{GR}}{D_{GP} + (1 - \phi_0)(D_{PD} + D_{PW})} \quad (\text{S7})$$

where,  $\phi_0$  is the particulate proportion of SVOCs in emission;  $D_{GP}$  is the intermedia  $D$  value between gas phase and particle phase;  $D_{GR}$  is the  $D$  value for the degradation of gas-phase SVOCs;  $D_{PD}$  and  $D_{PW}$  are the  $D$  values of the dry and wet depositions of particle-phase SVOCs, respectively.

For the LMW SVOCs, the dry and wet deposition fluxes of particle phase ( $F_{PD} + F_{PW}$ ) (**Fig. S5**) can be ignored (Li et al., 2015; Zhu et al., 2023), then the Eq. (S7) can be expressed as follows:

$$\frac{f_P}{f_G} = 1 + \frac{\phi_0 D_{GR}}{D_{GP}} \quad (\text{S8})$$

Based on the above equation, when  $\phi_0 D_{GR}$  cannot be ignored compared with  $D_{GP}$ ,  $f_P$  will be higher than  $f_G$ , and the  $K_P'$  values will deviate upward from equilibrium state. In other words, when  $\phi_0 F_{GR}$  ( $F_{GR} = f_G D_{GR}$ , the degradation flux of gas phase) cannot be ignored compared with  $F_{GP}$  ( $F_{GP} = f_G D_{GP}$ , the flux from gas phase to particle phase), the  $K_P'$  values will deviate upward from equilibrium state. Therefore, it can be concluded that the deviation was affected by both the gaseous degradation and the particulate proportion of SVOCs in emission.

## References:

- Harner, T. and Bidleman, T. F.: Octanol-air partition coefficient for describing particle/gas partitioning of aromatic compounds in urban air, *Environmental Science & Technology*, 32, 1494-1502, <https://doi.org/10.1021/es970890r>, 1998.
- Li, Y. F., Ma, W. L., and Yang, M.: Prediction of gas/particle partitioning of polybrominated diphenyl ethers (PBDEs) in global air: A theoretical study, *Atmospheric Chemistry and Physics*, 15, 1669-1681, <https://doi.org/10.5194/acp-15-1669-2015>, 2015.
- Zhu, F. J., Hu, P. T., and Ma, W. L.: A new steady-state gas-particle partitioning model of polycyclic aromatic hydrocarbons: Implication for the influence of the particulate proportion in emissions, *Atmospheric Chemistry and Physics*, 23, 8583-8590, <https://doi.org/10.5194/acp-23-8583-2023>, 2023.

**Table S1. Information of 49 Me-PAHs**

| Compounds                              | Abbreviations  | Categories | Rings | Quantitative ions | Qualitative ions | Retention time (min) | IDLs <sup>a</sup> (ng) | DR <sup>b</sup> |
|----------------------------------------|----------------|------------|-------|-------------------|------------------|----------------------|------------------------|-----------------|
| 2-Methylnaphthalene                    | 2-MeNap        | Me         | 2     | 142               | 141              | 6.858                | 0.0384                 | 84%             |
| 1-Methylnaphthalene                    | 1-MeNap        | Me         | 2     | 142               | 141              | 6.991                | 0.0505                 | 85%             |
| <u>2,6&amp;2,7-Dimethylnaphthalene</u> | 2,6&2,7-DMeNap | Me         | 2     | 156               | 141              | 7.710                | 0.0154                 | 46%             |
| 1,3-Dimethylnaphthalene                | 1,3-DMeNap     | Me         | 2     | 156               | 141              | 7.844                | 0.0904                 | 70%             |
| 1,6-Dimethylnaphthalene                | 1,6-DMeNap     | Me         | 2     | 156               | 141              | 7.886                | 0.0857                 | 73%             |
| <u>1,4&amp;1,5-Dimethylnaphthalene</u> | 1,4&1,5-DMeNap | Me         | 2     | 156               | 141              | 8.086                | 0.0467                 | 74%             |
| 1,2-Dimethylnaphthalene                | 1,2-DMeNap     | Me         | 2     | 156               | 141              | 8.220                | 0.138                  | 68%             |
| 1,8-Dimethylnaphthalene                | 1,8-DMeNap     | Me         | 2     | 156               | 141              | 8.462                | 0.126                  | -               |
| 2-Methylphenanthrene                   | 2-MePhe        | Me         | 3     | 192               | 191              | 17.476               | 0.310                  | 96%             |
| 2-Methylanthracene                     | 2-MeAnt        | Me         | 3     | 192               | 191              | 17.648               | 0.240                  | 88%             |
| 1-Methylanthracene                     | 1-MeAnt        | Me         | 3     | 192               | 191              | 17.812               | 0.207                  | -               |
| 1-Methylphenanthrene                   | 1-MePhe        | Me         | 3     | 192               | 191              | 17.855               | 0.239                  | 98%             |
| 9-Methylanthracene                     | 9-MeAnt        | Me         | 3     | 192               | 191              | 18.321               | 0.432                  | 56%             |
| 3,6-Dimethylphenanthrene               | 3,6-DMePhe     | Me         | 3     | 206               | 191              | 18.847               | 0.134                  | -               |
| 2,3-Dimethylanthracene                 | 2,3-DMeAnt     | Me         | 3     | 206               | 191              | 19.606               | 0.201                  | -               |
| 9-Methyl-9-phenylfluorene              | 9-Me-9-PFlu    | Me         | 4     | 241               | 256              | 20.015               | 0.0335                 | -               |
| 9,10-Dimethylanthracene                | 9,10-DMeAnt    | Me         | 3     | 206               | 191              | 20.155               | 0.245                  | -               |
| 2-Methylfluoranthene                   | 2-MeFluo       | Me         | 4     | 216               | 215              | 20.646               | 0.0636                 | 97%             |
| 1-Methylpyrene                         | 1-MePyr        | Me         | 4     | 216               | 215              | 21.453               | 0.0620                 | 97%             |
| 1-Methylbenzo[c]phenanthrene           | 1-MeBcP        | Me         | 4     | 242               | 241              | 22.584               | 0.0570                 | 92%             |
| 2-Methylbenzo[c]phenanthrene           | 2-MeBcP        | Me         | 4     | 242               | 241              | 23.230               | 0.0275                 | 84%             |

*continued Table S1*

| Compounds                                                                 | Abbreviations         | Categories | Rings | Quantitative ions | Qualitative ions | Retention time (min) | IDLs <sup>a</sup> (ng) | DR <sup>b</sup> |
|---------------------------------------------------------------------------|-----------------------|------------|-------|-------------------|------------------|----------------------|------------------------|-----------------|
| 3-Methylbenzo[c]phenanthrene                                              | 3-MeBcP               | Me         | 4     | 242               | 241              | 23.623               | 0.0700                 | 84%             |
| 5-Methylbenzo[c]phenanthrene                                              | 5-MeBcP               | Me         | 4     | 242               | 241              | 23.800               | 0.0641                 | -               |
| 4-Methylbenzo[c]phenanthrene                                              | 4-MeBcP               | Me         | 4     | 242               | 241              | 23.846               | 0.0673                 | -               |
| <u>1&amp;2-Methylbenz[a]anthracene</u>                                    | 1&2-MeBaA             | Me         | 4     | 242               | 241              | 24.138               | 0.0367                 | 74%             |
| <u>7&amp;9-Methylbenz[a]anthracene</u>                                    | 7&9-MeBaA             | Me         | 4     | 242               | 241              | 24.254               | 0.0331                 | 70%             |
| <u>6&amp;4-Methylbenz[a]anthracene</u>                                    | 6&4-MeBaA             | Me         | 4     | 242               | 241              | 24.308               | 0.0313                 | 62%             |
| 1,12-Dimethylbenzo[c]phenanthrene                                         | 1,12-DMeBcP           | Me         | 4     | 256               |                  | 24.469               | 0.0607                 | -               |
| <u>5&amp;6&amp;4-Methylchrysene &amp; 3&amp;5-Methylbenz[a]anthracene</u> | 5&6&4-MeChr&3&5-MeBaA | Me         | 4     | 242               | 241              | 24.500               | 0.0214                 | 98%             |
| 10-Methylbenz[a]anthracene                                                | 10-MeBaA              | Me         | 4     | 242               | 241              | 24.893               | 0.103                  | -               |
| 5,8-Dimethylbenzo[c]phenanthrene                                          | 5,8-DMeBcP            | Me         | 4     | 256               | 239              | 25.270               | 0.0933                 | -               |
| 6,8-Dimethylbenz[a]anthracene                                             | 6,8-DMeBaA            | Me         | 4     | 256               | 239              | 25.462               | 0.0908                 | -               |
| 3,9-Dimethylbenz[a]anthracene                                             | 3,9-DMeBaA            | Me         | 4     | 256               | 239              | 25.578               | 0.108                  | 50%             |
| 7,12-Dimethylbenz[a]anthracene                                            | 7,12-DMeBaA           | Me         | 4     | 256               | 239              | 26.457               | 0.190                  | -               |
| 3-Methylcholanthrene                                                      | 3-Me-Cho              | Me         | 5     | 268               | 253              | 29.440               | 0.951                  | -               |
| 9-Methylbenzo[a]pyrene                                                    | 9-MeBaP               | Me         | 5     | 266               | 265              | 29.728               | 0.595                  | -               |
| 8-Methylbenzo[a]pyrene                                                    | 8-MeBaP               | Me         | 5     | 266               | 265              | 29.929               | 0.271                  | -               |
| <u>7&amp;10-Methylbenzo[a]pyrene</u>                                      | 7&10-MeBaP            | Me         | 5     | 266               | 265              | 30.252               | 0.590                  | -               |
| 7,10-Dimethylbenzo[a]pyrene                                               | 7,10-DMeBaP           | Me         | 5     | 280               | 131              | 33.153               | 0.505                  | -               |

Note: Underlined compounds represent that the instrumental method cannot achieve chromatographic separation for these compounds with same quantitative and qualitative ions.

a, represents instrument detection limits.

b, represents detection rate of all samples (include gaseous and particulate samples).

“-” represents the detection rate was below 30%.

**Table S2. Values and the calculation parameters for *A* and *B* of several Me-PAHs**

| Compounds   | E <sup>a</sup> | S <sup>a</sup> | A <sup>a</sup> | B <sup>a</sup> | V <sup>a</sup> | L <sup>a</sup> | log <i>K</i> <sub>OA</sub> (25°C) <sup>b</sup> | Δ <i>H</i> <sub>OA</sub> (kJ/mol) <sup>b</sup> | <i>A</i> <sup>c</sup> | <i>B</i> <sup>c</sup> |
|-------------|----------------|----------------|----------------|----------------|----------------|----------------|------------------------------------------------|------------------------------------------------|-----------------------|-----------------------|
| 2-MeNap     | 1.3            | 0.81           | 0              | 0.25           | 1.2263         | 5.617          | 5.51                                           | 56.43                                          | -4.38                 | 2948                  |
| 1-MeNap     | 1.34           | 0.94           | 0              | 0.22           | 1.2263         | 5.802          | 5.73                                           | 57.16                                          | -4.28                 | 2986                  |
| 2,6-DMeNap  | 1.35           | 0.82           | 0              | 0.25           | 1.3672         | 6.146          | 6.01                                           | 61.26                                          | -4.72                 | 3200                  |
| 2,7-DMeNap  | 1.35           | 0.82           | 0              | 0.25           | 1.3672         | 6.147          | 6.01                                           | 61.27                                          | -4.72                 | 3201                  |
| 1,3-DMeNap  | 1.39           | 0.92           | 0              | 0.2            | 1.3672         | 6.236          | 6.1                                            | 61.07                                          | -4.60                 | 3190                  |
| 1,6-DMeNap  | 1.37           | 0.94           | 0              | 0.21           | 1.3672         | 6.347          | 6.23                                           | 62.11                                          | -4.65                 | 3244                  |
| 1,4-DMeNap  | 1.4            | 0.91           | 0              | 0.2            | 1.3672         | 6.339          | 6.19                                           | 62.12                                          | -4.69                 | 3245                  |
| 1,5-DMeNap  | 1.4            | 1.05           | 0              | 0.18           | 1.3672         | 6.545          | 6.45                                           | 63.08                                          | -4.60                 | 3295                  |
| 1,2-DMeNap  | 1.43           | 0.97           | 0              | 0.25           | 1.3672         | 6.473          | 6.38                                           | 63.51                                          | -4.75                 | 3318                  |
| 1,8-DMeNap  | 1.4            | 1.01           | 0              | 0.21           | 1.3672         | 6.653          | 6.55                                           | 64.64                                          | -4.78                 | 3377                  |
| 2-MePhe     | 2.06           | 1.25           | 0              | 0.29           | 1.5953         | 8.307          | 8.16                                           | 79.55                                          | -5.78                 | 4155                  |
| 2-MeAnt     | 2.29           | 1.3            | 0              | 0.31           | 1.5953         | 8.184          | 8.04                                           | 78.25                                          | -5.67                 | 4088                  |
| 1-MeAnt     | 2.29           | 1.3            | 0              | 0.3            | 1.5953         | 8.332          | 8.17                                           | 79.59                                          | -5.77                 | 4158                  |
| 1-MePhe     | 2.06           | 1.25           | 0              | 0.29           | 1.5953         | 8.408          | 8.26                                           | 80.53                                          | -5.85                 | 4207                  |
| 9-MeAnt     | 2.25           | 1.27           | 0              | 0.3            | 1.5953         | 8.438          | 8.27                                           | 80.79                                          | -5.88                 | 4220                  |
| 3,6-DMePhe  | 2.05           | 1.29           | 0              | 0.29           | 1.7362         | 8.7            | 8.56                                           | 82.89                                          | -5.96                 | 4330                  |
| 9,10-DMeAnt | 2.25           | 1.25           | 0              | 0.28           | 1.7362         | 9.283          | 9.04                                           | 88.67                                          | -6.50                 | 4632                  |
| 1-MePyr     | 2.81           | 1.7            | 0              | 0.26           | 1.7255         | 9.541          | 9.4                                            | 88.28                                          | -6.07                 | 4611                  |
| 1-MeBaA     | 2.99           | 1.7            | 0              | 0.35           | 1.9643         | 10.763         | 10.58                                          | 100.54                                         | -7.03                 | 5252                  |
| 7-MeBaA     | 2.99           | 1.7            | 0              | 0.35           | 1.9643         | 11.096         | 10.89                                          | 103.76                                         | -7.29                 | 5420                  |
| 4-MeBaA     | 2.99           | 1.7            | 0              | 0.35           | 1.9643         | 10.909         | 10.72                                          | 101.95                                         | -7.14                 | 5326                  |
| 5-MeChr     | 3.03           | 1.73           | 0              | 0.36           | 1.9643         | 10.905         | 10.73                                          | 101.82                                         | -7.11                 | 5319                  |



*continued Table S2*

| Compounds   | E <sup>a</sup> | S <sup>a</sup> | A <sup>a</sup> | B <sup>a</sup> | V <sup>a</sup> | L <sup>a</sup> | log $K_{\text{OA}}$ (25°C) <sup>b</sup> | $\Delta H_{\text{OA}}$ (kJ/mol) <sup>b</sup> | A <sup>c</sup> | B <sup>c</sup> |
|-------------|----------------|----------------|----------------|----------------|----------------|----------------|-----------------------------------------|----------------------------------------------|----------------|----------------|
| 6-MeChr     | 3.03           | 1.73           | 0              | 0.36           | 1.9643         | 10.934         | 10.76                                   | 102.1                                        | -7.13          | 5333           |
| 4-MeChr     | 3.03           | 1.73           | 0              | 0.36           | 1.9643         | 10.937         | 10.76                                   | 102.13                                       | -7.13          | 5335           |
| 7,12-DMeBaA | 2.99           | 1.65           | 0              | 0.35           | 2.1052         | 11.753         | 11.48                                   | 110.19                                       | -7.83          | 5756           |
| 3-MeCho     | 3.26           | 1.57           | 0              | 0.51           | 2.1375         | 12.482         | 12.19                                   | 119.14                                       | -8.68          | 6223           |

Note:

a, Ulrich, N., Endo, S., Brown, T.N., Watanabe, N., Bronner, G., Abraham, M.H., Goss, K.-U., UFZ-LSER database v 3.2.1 [Internet], Leipzig, Germany, Helmholtz Centre for Environmental Research-UFZ. 2017 [accessed on 09.08.2022]. Available from <http://www.ufz.de/lserd>.

b, log  $K_{\text{OA}}$  (25°C) and  $\Delta H_{\text{OA}}$  (kJ/mol) were calculated using the parameters in **Table S1 and S2**.

c,  $B$  is calculated by the equation:  $B = \Delta H_{\text{OA}} / (\ln(10) * 8.314)$ ,  $A$  is calculated by the equation:  $A = \log K_{\text{OA}} (25^\circ\text{C}) - B / 298.15$ .

**Table S3. Calculation parameters for  $\log K_{OA}$  (25°C) and  $\Delta H_{OA}$  (kJ/mol)**

| Parameters               | e     | s     | a     | b    | v     | l    | constant | Equations                                                             | References |
|--------------------------|-------|-------|-------|------|-------|------|----------|-----------------------------------------------------------------------|------------|
| $\log K_{OA}$ (25°C)     | -0.21 | 0.56  | 3.51  | 0.75 |       | 0.94 | -0.15    | Parameter = $l * L + s * S + a * A + b * B + e * E + \text{constant}$ | [1]        |
| $\Delta H_{OA}$ (kJ/mol) |       | -6.04 | 53.66 | 9.19 | -1.57 | 9.66 | 6.67     | Parameter = $l * L + s * S + a * A + b * B + v * V + \text{constant}$ | [2]        |

## References:

- [1] Abraham, M. H., Acree, W. E., Jr., Leo, A. J., Hoekman, D., and Cavanaugh, J. E.: Water-solvent partition coefficients and  $\Delta \log P$  values as predictors for blood-brain distribution; application of the akaike information criterion, *Journal of Pharmaceutical Sciences*, 99, 2492-2501, <https://doi.org/10.1002/jps.22010>, 2010.
- [2] Mintz, C., Burton, K., Ladlie, T., Clark, M., Acree, W. E., Jr., and Abraham, M. H.: Enthalpy of solvation correlations for gaseous solutes dissolved in dibutyl ether and ethyl acetate, *Thermochimica Acta*, 470, 67-76, <https://doi.org/10.1016/j.tca.2008.02.001>, 2008.

**Table S4. The geometric mean values of the N/D ratios for different phases Me-PAHs in different seasons**

|                | Total Phase |                |                    | Particle Phase |                |                    | Gas Phase   |                |                    |
|----------------|-------------|----------------|--------------------|----------------|----------------|--------------------|-------------|----------------|--------------------|
|                | All season  | Heating season | Non-heating season | All season     | Heating season | Non-heating season | All season  | Heating season | Non-heating season |
| 2-MeNap        | <b>2.67</b> | <b>2.14</b>    | <b>3.30</b>        | 0.842          | <b>0.561</b>   | 2.23               | <b>2.73</b> | <b>2.21</b>    | <b>3.33</b>        |
| 1-MeNap        | <b>3.16</b> | <b>2.22</b>    | 4.41               | 0.819          | <b>0.493</b>   | 2.47               | <b>3.25</b> | <b>2.30</b>    | <b>4.51</b>        |
| 2,6&2,7-DMeNap | <b>2.19</b> | <b>2.02</b>    | <b>7.30</b>        | 0.347          | 0.347          | -                  | <b>2.37</b> | <b>2.19</b>    | 7.30               |
| 1,3-DMeNap     | <b>2.97</b> | <b>2.01</b>    | <b>4.27</b>        | 0.588          | 0.499          | 3.03               | <b>3.03</b> | <b>2.11</b>    | <b>4.27</b>        |
| 1,6-DMeNap     | <b>2.76</b> | <b>1.93</b>    | <b>3.85</b>        | 0.604          | 0.528          | 1.18               | <b>2.83</b> | <b>2.03</b>    | <b>3.87</b>        |
| 1,4&1,5-DMeNap | <b>2.67</b> | <b>1.88</b>    | <b>3.72</b>        | 0.501          | <b>0.429</b>   | 3.28               | <b>2.73</b> | <b>1.96</b>    | <b>3.72</b>        |
| 1,2-DMeNap     | <b>2.45</b> | 1.75           | <b>3.35</b>        | 0.557          | 0.557          | -                  | <b>2.49</b> | <b>1.82</b>    | <b>3.35</b>        |
| 2-MePhe        | 1.11        | 1.12           | 1.10               | 1.09           | 0.984          | 1.24               | 1.11        | 1.14           | 1.09               |
| 2-MeAnt        | 1.20        | 1.32           | 1.11               | 1.68           | 1.34           | <b>2.94</b>        | 1.04        | 1.05           | 1.03               |
| 1-MePhe        | 1.15        | 1.12           | 1.18               | 1.08           | 0.975          | 1.22               | 1.15        | 1.14           | 1.17               |
| 9-MeAnt        | <b>2.07</b> | 2.49           | 1.38               | 2.04           | 2.04           | -                  | <b>1.89</b> | 2.78           | 1.28               |
| 2-MeFluo       | 1.36        | 1.23           | 1.50               | 1.61           | 1.24           | <b>2.05</b>        | 1.05        | 0.68           | 1.46               |
| 1-MePyr        | <b>1.65</b> | 1.39           | <b>1.95</b>        | <b>1.97</b>    | 1.40           | <b>2.71</b>        | <b>1.31</b> | 0.81           | <b>1.89</b>        |
| 1-MeBcP        | 1.93        | 1.25           | <b>2.88</b>        | 1.83           | 1.30           | <b>2.63</b>        | <b>1.86</b> | 1.01           | <b>2.79</b>        |
| 2-MeBcP        | 1.73        | 1.26           | <b>2.34</b>        | <b>1.90</b>    | 1.27           | <b>2.78</b>        | 1.56        | 1.12           | 1.72               |
| 3-MeBcP        | 1.61        | 1.27           | <b>2.01</b>        | 1.67           | 1.26           | <b>2.24</b>        | 1.45        | 1.15           | 1.54               |
| 1&2-MeBaA      | <b>2.04</b> | 1.57           | <b>2.61</b>        | <b>2.08</b>    | 1.56           | <b>2.72</b>        | 1.79        | 0.87           | 2.70               |
| 7&9-MeBaA      | 1.69        | 1.35           | 2.11               | 1.61           | 1.34           | <b>1.99</b>        | 1.22        | 1.48           | 1.15               |
| 6&4-MeBaA      | <b>1.85</b> | 1.44           | <b>2.33</b>        | <b>1.84</b>    | 1.44           | <b>2.31</b>        | 1.22        | -              | 1.22               |

*continued Table S4*

|                         | Total Phase |                |                    | Particle Phase |                |                    | Gas Phase  |                |                    |
|-------------------------|-------------|----------------|--------------------|----------------|----------------|--------------------|------------|----------------|--------------------|
|                         | All season  | Heating season | Non-heating season | All season     | Heating season | Non-heating season | All season | Heating season | Non-heating season |
| 5&6&4-MeChr&3&5-MeBaA   | <b>1.90</b> | 1.46           | <b>2.42</b>        | <b>2.01</b>    | 1.46           | <b>2.77</b>        | 1.31       | 1.17           | 1.46               |
| 3,9-DMeBaA              | <b>1.86</b> | 1.72           | <b>2.01</b>        | <b>1.86</b>    | 1.72           | <b>2.01</b>        | -          | -              | -                  |
| Number of significances | 13          | 6              | 14                 | 6              | 3              | 11                 | 10         | 7              | 8                  |

Note: The bold numbers represent the mean concentrations of Me-PAHs in nighttime were significant different with those in daytime ( $p < 0.05$ ).

**Table S5. Gaseous degradation rate ( $\text{h}^{-1}$ ) (hydroxyl radicals reaction) of Me-Naps and U-PAHs under different temperatures**

| PAHs           | $k_{\text{deg}_{25}}$ | $k_{\text{deg}_{-50}}$ | $k_{\text{deg}_{50}}$ |
|----------------|-----------------------|------------------------|-----------------------|
| 2-MeNap        | 0.305                 | 0.0787                 | 0.417                 |
| 1-MeNap        | 0.305                 | 0.0787                 | 0.417                 |
| 2,6&2,7-DMeNap | 0.375                 | 0.0966                 | 0.512                 |
| 1,3-DMeNap     | 0.375                 | 0.0966                 | 0.512                 |
| 1,6-DMeNap     | 0.375                 | 0.0966                 | 0.512                 |
| 1,4&1,5-DMeNap | 0.375                 | 0.0966                 | 0.512                 |
| 1,2-DMeNap     | 0.375                 | 0.0966                 | 0.512                 |
| acenaphthylene | 0.408                 | 0.118                  | 0.557                 |
| acenaphthene   | 0.361                 | 0.105                  | 0.493                 |
| fluorene       | 0.0478                | 0.0139                 | 0.0653                |

Note: The gaseous degradation rate of PAHs can be calculated using the half-lives of PAHs:  $k_{\text{degi}} = \ln(2)/t_{1/2}$ , and the half-lives of PAHs were calculated from EPI suite.

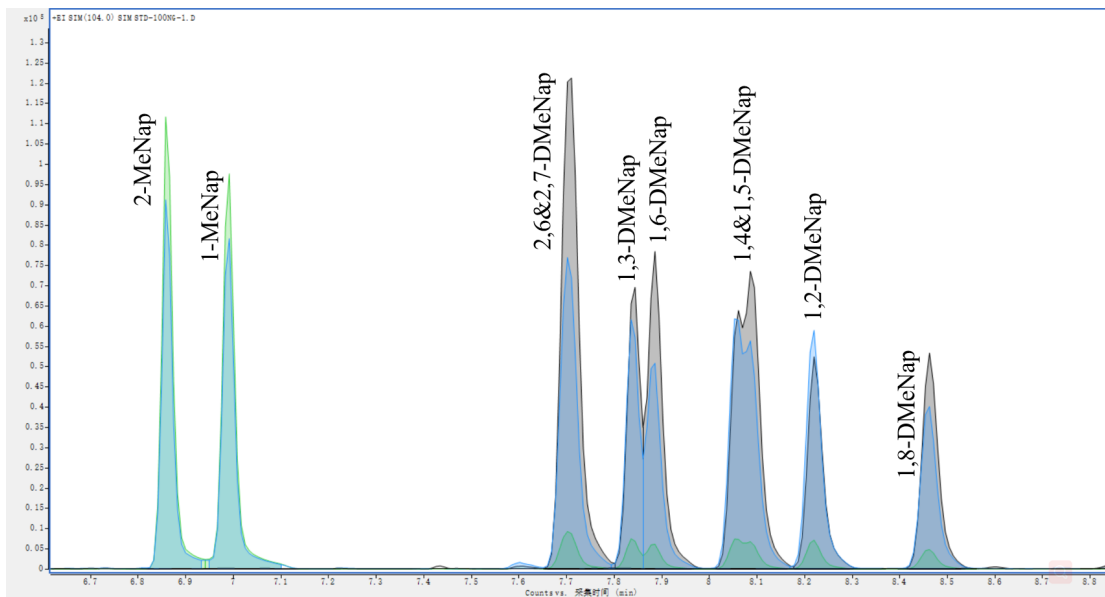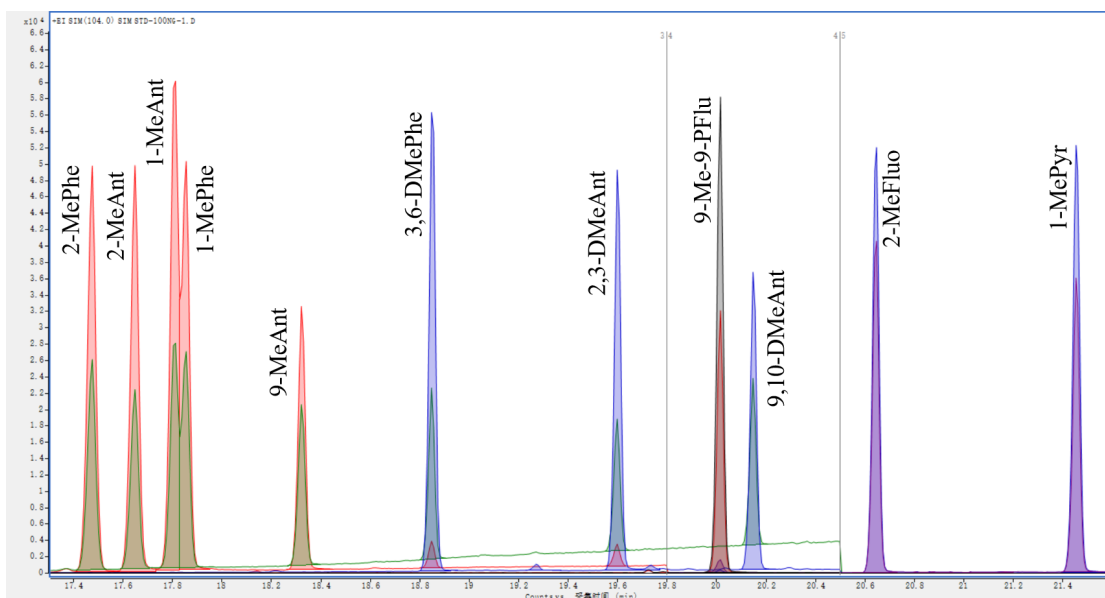

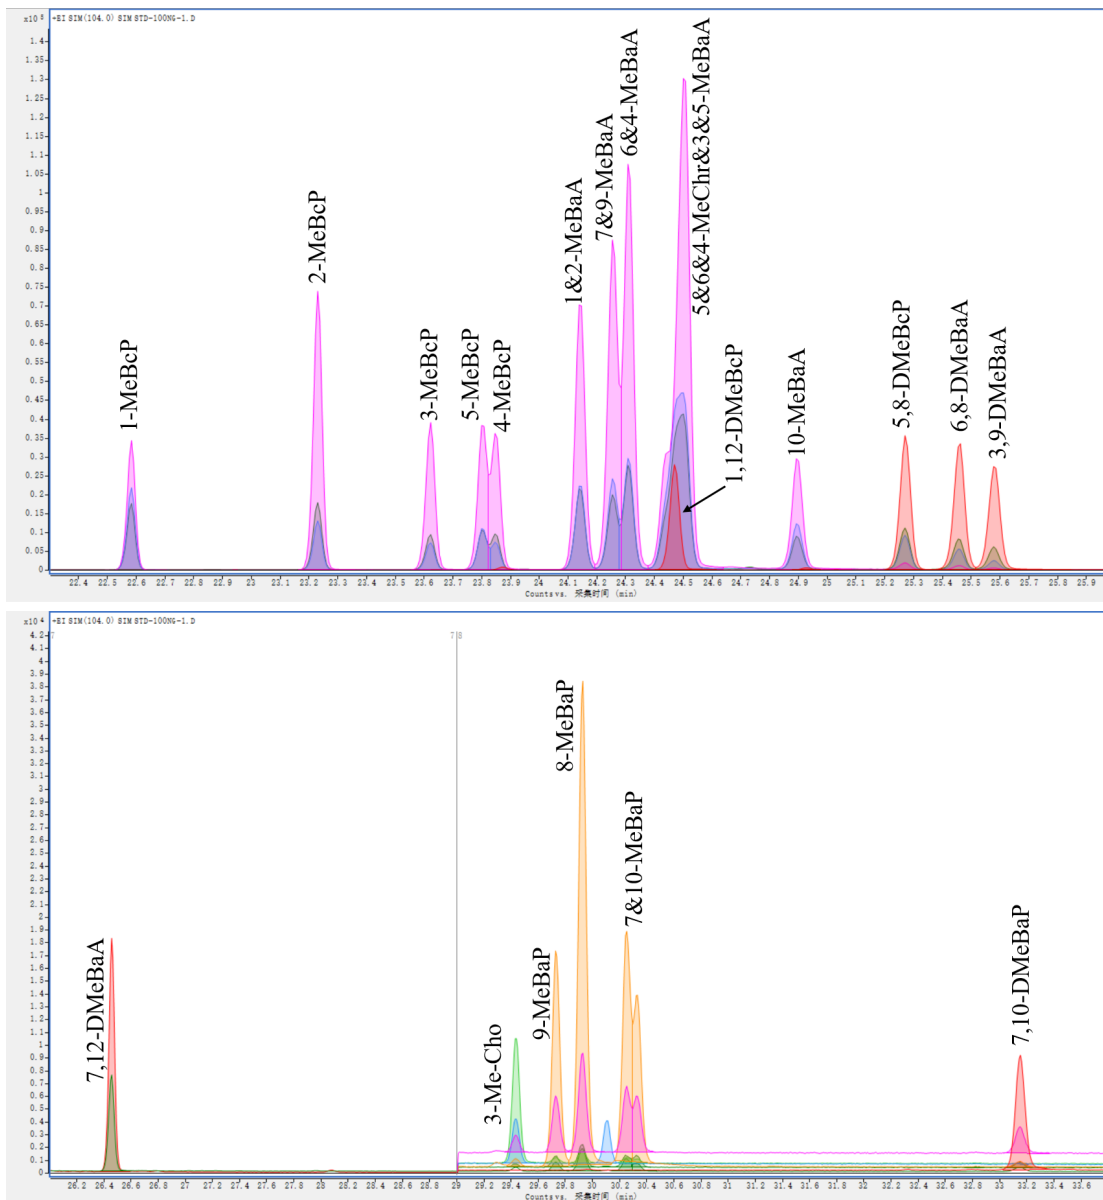

**Fig. S1. Chromatographic separation of 49 Me-PAHs in standard solutions (100 ng/mL)**

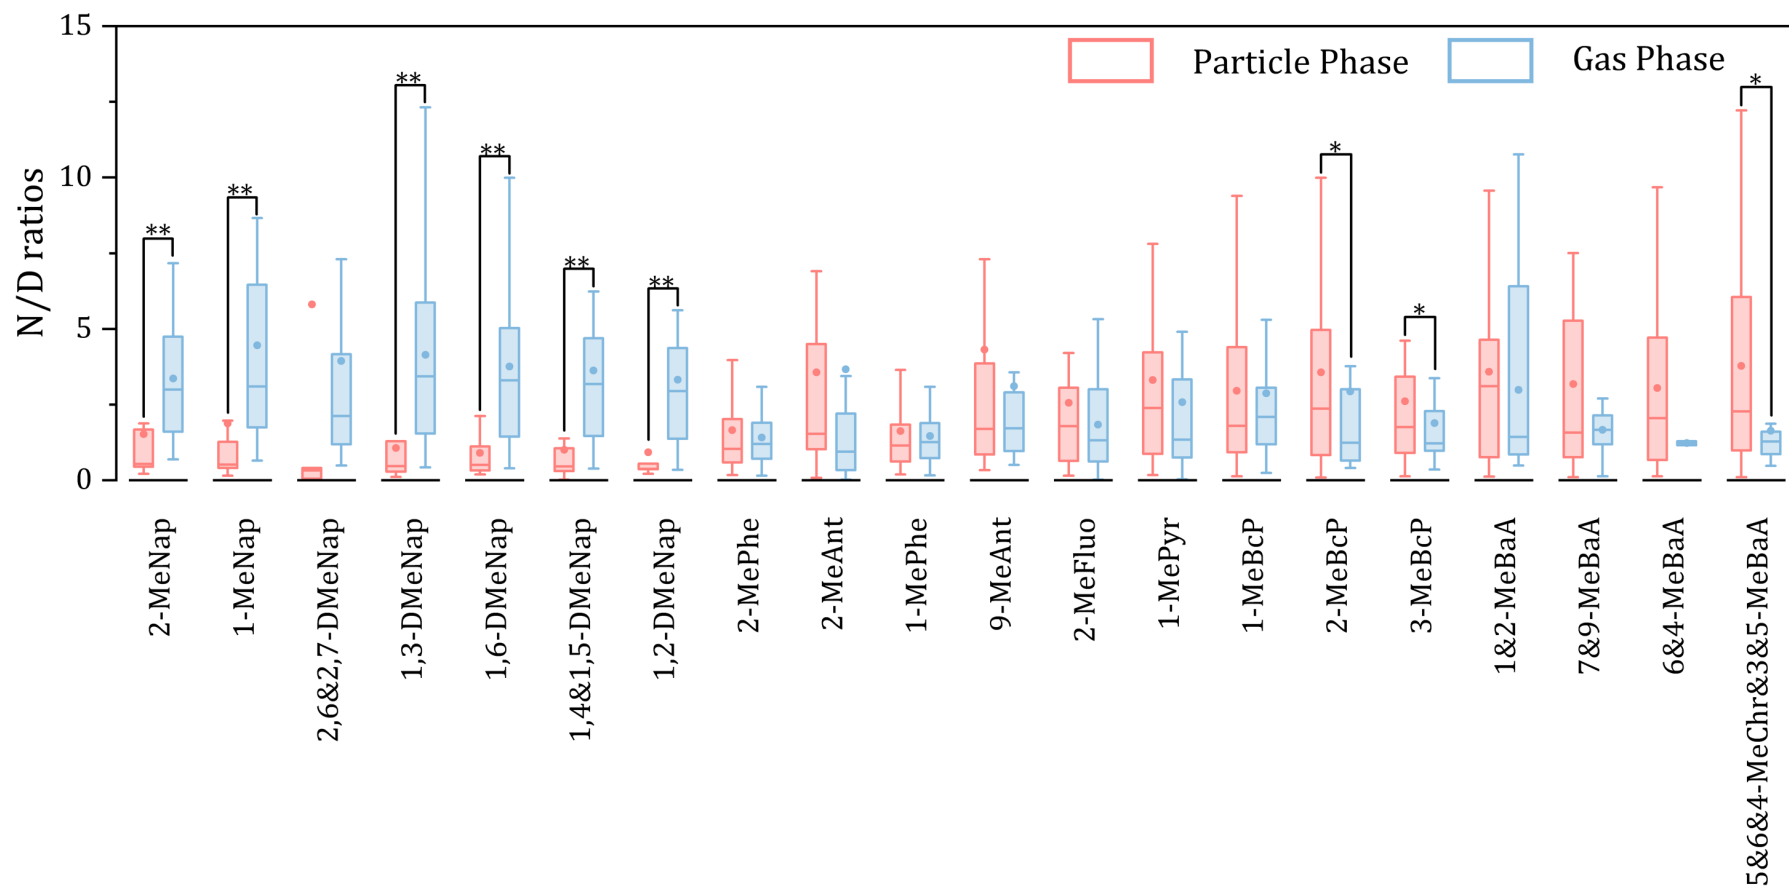

**Fig. S2. Comparison of the values of N/D ratios for individual Me-PAHs between particle phase and gas phase**

(Note: \* and \*\* represent that the differences are significant at 0.05 and 0.01 level.)



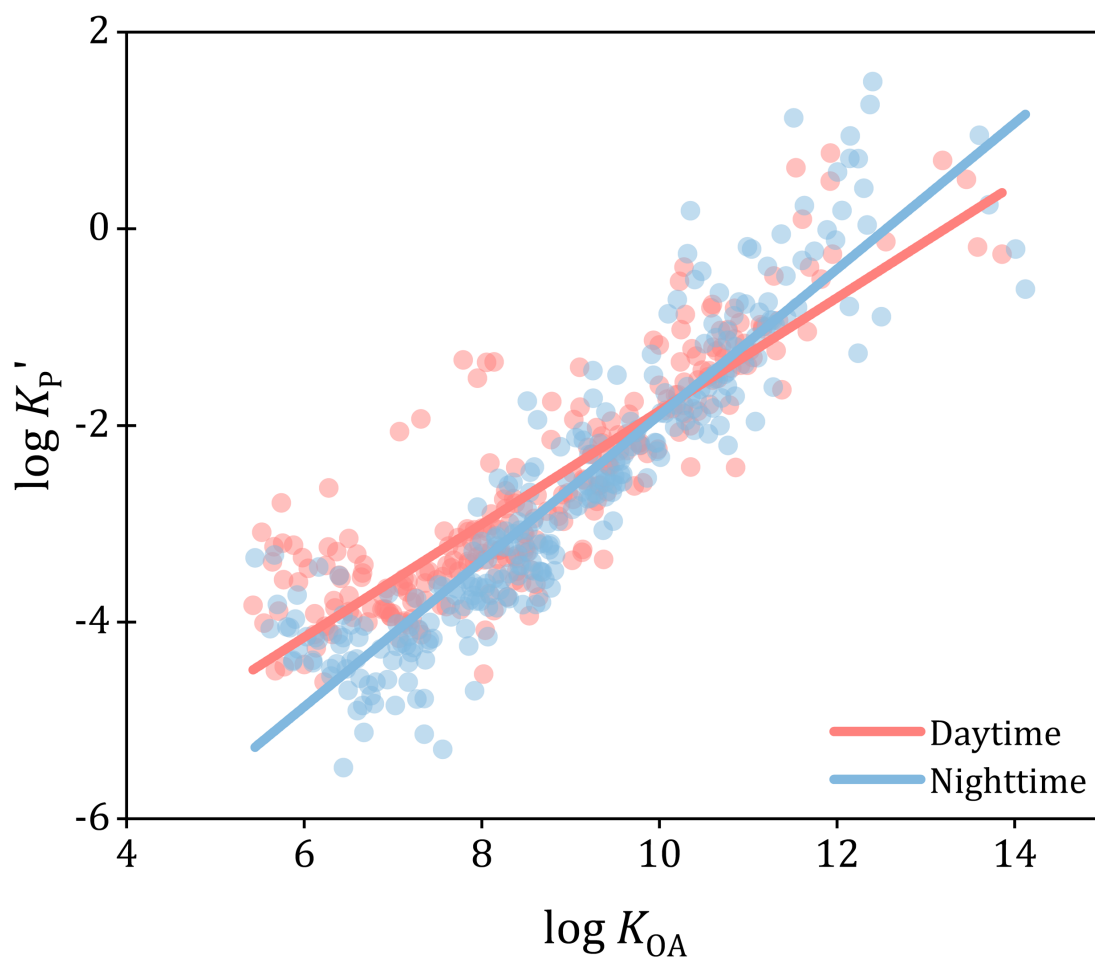

**Fig. S3. Comparison the regression lines of  $\log K_{P'}$  against  $\log K_{OA}$  between daytime and nighttime for total Me-PAHs**

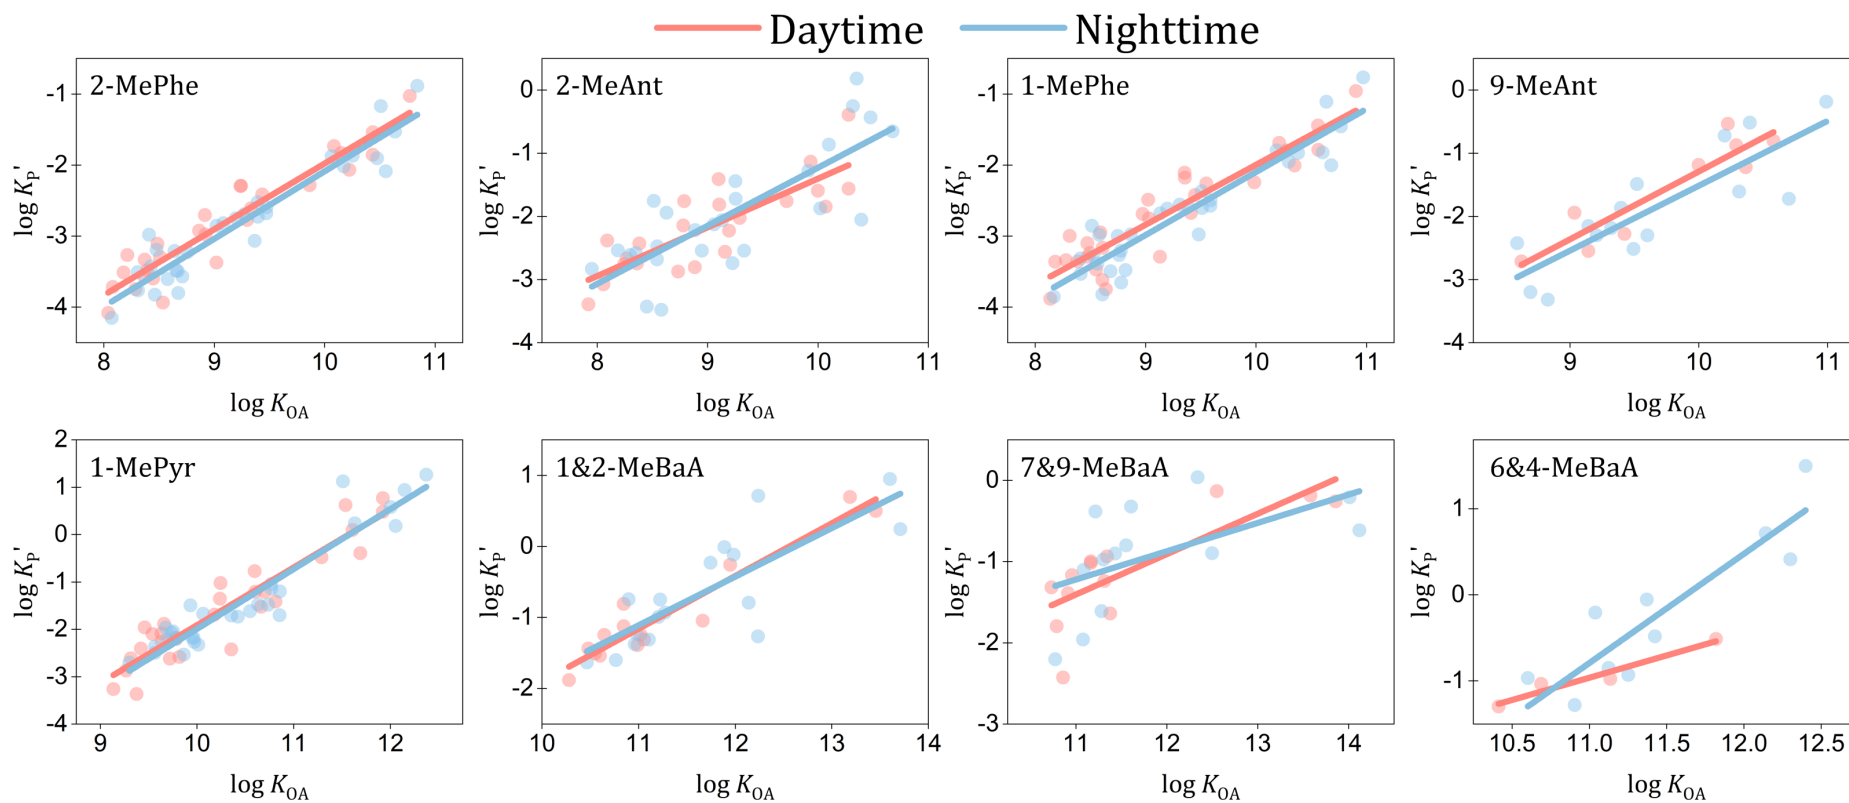

**Fig. S4. Comparison of the regression lines of  $\log K_P'$  against  $\log K_{OA}$  between daytime and nighttime for part of individual Me-PAHs**

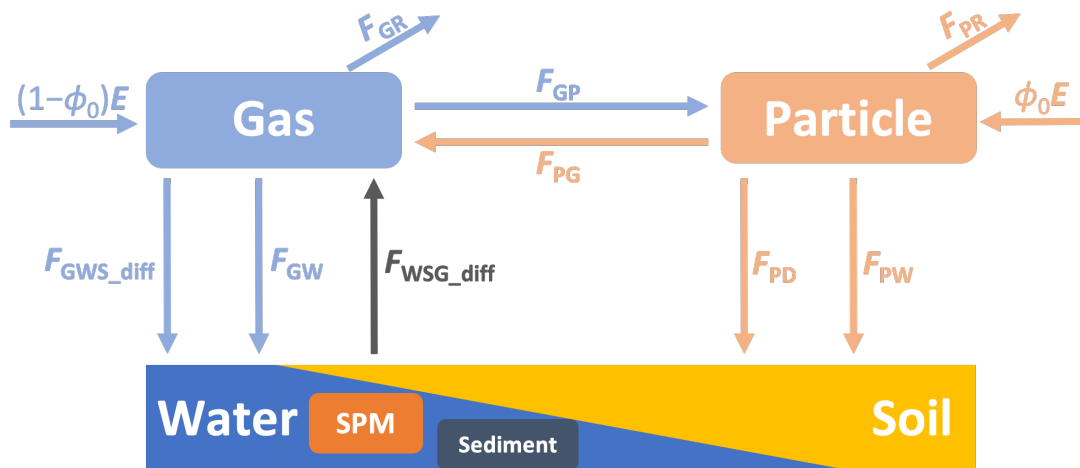

**Fig. S5. The fluxes related to the gas and particle phase in the six-compartment model**

(Note:  $F_{GR}$ : degradation flux of gas phase PAHs;  $F_{PR}$ : degradation flux of particle phase PAHs;  $F_{GP}$ : migration flux from gas phase to particle phase;  $F_{PG}$ : migration flux from particle phase to gas phase;  $F_{GWS\_diff}$ : diffusion fluxes from gas phase to water and/or soil phases;  $F_{GW}$ : wet deposition flux of gas phase PAHs to water and/or soil phase;  $F_{WSG\_diff}$ : diffusion fluxes from soil and/or water phases to gas phase;  $F_{PD}$ : dry deposition flux of particle phase PAHs to SPM and/or soil phase;  $F_{PW}$ : wet deposition flux of particle phase PAHs to SPM and/or soil phase;  $(1-\phi_0)E$ : emission flux of gas phase PAHs;  $\phi_0 E$ : emission flux of particle phase PAHs.)

The Figure was cited from our previous study:

Zhu, F. J., Hu, P. T., and Ma, W. L.: A new steady-state gas–particle partitioning model of polycyclic aromatic hydrocarbons: Implication for the influence of the particulate proportion in emissions, *Atmospheric Chemistry and Physics*, 23, 8583-8590, <https://doi.org/10.5194/acp-23-8583-2023>, 2023.
